# Supplementary material for: Using Monozygotic Twins to Dissect Common Genes in Posttraumatic Stress Disorder and Migraine
Source: Front Neurosci. 2021 Jun 22;15:678350. doi: 10.3389/fnins.2021.678350 (PMC8258453; doi:10.3389/fnins.2021.678350)
Supplement: Supplementary Table 1 — A list of all PTSD Candidate genes tested in the MZ twins. [file Table_1.xlsx]

## Sheet: SupTable1 PTSD candidate genes
Supplementary Table 1: A list of all PTSD Candidate genes tested in the MZ twins
Gene Symbol	Number of CpGs tested	≧ 1 CpG significant with p ≦ 0.05 (No of CpGs with p ≦ 0.05)	Survive Bonferroni
HDAC4*	510	YES(54)	NO
RORA	238	YES(18)	NO
ANK3	160	YES(7)	NO
DOCK2	96	YES(7)	YES
BDNF*	93	YES(7)	NO
NOS1AP	92	YES(7)	NO
NR3C1*	89	YES(11)	NO
NLGN1	86	YES(8)	NO
SLC6A3	81	YES(7)	YES
WWC1	77	YES(8)	NO
CRHR1	70	YES(8)	NO
ANKRD55	58	YES(4)	NO
COMT	55	YES(8)	NO
FKBP5*	53	YES(6)	NO
NR3C2	53	YES(13)	NO
DICER1	49	YES(5)	YES
CRHR2	41	YES(4)	NO
DRD2	41	YES(4)	YES
ADCYAP1	40	YES(3)	YES
STMN1	38	YES(1)	YES
MAN2C1	37	NO	NO
ADCYAP1R1	36	YES(5)	YES
PRTFDC1	36	YES(4)	NO
CNR1	35	YES(11)	NO
TPH2	33	YES(3)	NO
SLC6A4	31	YES(2)	YES
SRD5A2	27	YES(1)	NO
GABRA2	26	YES(2)	NO
SLC18A2	26	YES(1)	NO
SKA2	25	YES(4)	YES
MAOA	24	YES(1)	NO
OPRL1	24	YES(2)	NO
NPY	22	NO	NO
OXTR	22	YES(3)	YES
HTR3A	20	YES(1)	NO
DBH	18	YES(3)	YES
RGS2	18	YES(2)	NO
IL12B	17	YES(1)	NO
AIM2	16	YES(1)	NO
MAOB	16	YES(2)	NO
ADRB2	14	YES(1)	NO
TPH1	11	YES(1)	NO
ZNF626	9	YES(1)	YES
PRR11	6	NO	NO
GLUT1	0	NO	NO
TRAIP	22	YES(2)	YES
TSNARE1	215	YES(27)	YES
IMMP2L	96	YES(10)	YES
PLEKHM1	31	YES(1)	YES
MAD1L1	817	YES(98)	NO
LINC01360	2	NO	NO
C19orf60	20	YES(3)	NO
LOC102723362	3	NO	NO
OPCML	217	YES(20)	NO
PCDHA1	40	YES(2)	NO
EXD3	97	YES(13)	NO
TCF4	164	YES(13)	NO
SATB1-AS1	36	YES(3)	NO
SPACA1	14	NO	NO
FBXL17	56	YES(4)	NO
