# Supplementary material for: Using Monozygotic Twins to Dissect Common Genes in Posttraumatic Stress Disorder and Migraine
Source: Front Neurosci. 2021 Jun 22;15:678350. doi: 10.3389/fnins.2021.678350 (PMC8258453; doi:10.3389/fnins.2021.678350)
Supplement: Supplementary Table 3 — A list of all PTSD Candidate genes associated with migraine in the MZ migraine twins. [file Table_3.xlsx]

## Sheet: SupTab3_PTSDcandidates in mig
Supplementary Table 3: A list of all PTSD Candidate genes associated with migraine in the MZ migraine twins.
Gene Symbol	Number of CpGs tested	≧ 1 CpG significant with p ≦ 0.05 (No of CpGs with p ≦ 0.05)	Survive bonferroni
ADCYAP1	40	YES(4)	YES
ADCYAP1R1	36	YES(2)	NO
ADRB2	14	NO	NO
AIM2	16	YES(1)	YES
ANK3	160	YES(15)	NO
ANKRD55	58	YES(2)	NO
BDNF*	93	YES(7)	NO
CNR1	35	YES(4)	NO
COMT	55	YES(2)	NO
CRHR1	70	YES(7)	YES
CRHR2	41	YES(4)	NO
DBH	18	YES(2)	YES
DICER1	49	YES(3)	NO
DOCK2	96	YES(8)	YES
DRD2	41	YES(1)	NO
FKBP5*	53	YES(9)	YES
GABRA2	26	NO	NO
GLUT1	0
HDAC4*	510	YES(44)	NO
HTR3A	20	YES(4)	YES
IL12B	17	NO	NO
MAN2C1	37	YES(2)	NO
MAOA	24	YES(2)	NO
MAOB	16	YES(2)	NO
NLGN1	86	YES(9)	NO
NOS1AP	92	YES(8)	NO
NPY	22	YES(2)	NO
NR3C1*	89	YES(10)	NO
NR3C2	53	YES(6)
OPRL1	24	YES(2)	NO
OXTR	22	YES(3)	YES
PRR11	6	NO	NO
PRTFDC1	36	YES(2)	NO
RGS2	18	YES(1)	NO
RORA	238	YES(21)	YES
SKA2	25	YES(6)	NO
SLC18A2	26	YES(1)	NO
SLC6A3	81	YES(7)	NO
SLC6A4	31	YES(2)	NO
SRD5A2	27	YES(2)	NO
STMN1	38	YES(2)	NO
TPH1	11	YES(1)	NO
TPH2	33	YES(3)	NO
WWC1	77	YES(5)	YES
ZNF626	9	NO	NO
TRAIP	22	NO	NO
TSNARE1	215	YES(12)	YES
IMMP2L	96	YES(7)	NO
PLEKHM1	31	YES(1)	NO
MAD1L1	817	YES(71)	NO
LINC01360	2	NO	NO
C19orf60	20	YES(1)	NO
LOC102723362	3	NO	NO
OPCML	217	YES(22)	NO
PCDHA1	40	YES(3)	NO
EXD3	97	YES(6)	NO
TCF4	164	YES(16)	NO
SATB1-AS1	36	YES(2)	NO
SPACA1	14	YES(3)	NO
FBXL17	56	YES(2)	NO
